# Supplementary material
Source: PubMed Central journal article supplement (PMC4156765)
Supplement: 1413620111_pnas.201413620SI.pdf [file 1413620111_pnas.201413620SI.pdf]

# Supporting Information

Bhatnagar et al. 10.1073/pnas.1413620111

## SI Materials and Methods

**Single-Nucleotide Primer Extension Assay.** A single-nucleotide primer extension (SNuPE) assay for *Pgk1* was carried out using a TaqMan SNP genotyping assay (Applied Biosystems) according to the manufacturer's specifications. The following primers and reporters were used for the assay: 5'-CCGGCCAAAATTGATGCTTTCC-3', 5'-CAGTCCCAAAGCATCATTGACAT-3', 5'-CACTGTCCAACTAGG-3', and 5'-CACTGTCCACACTAGG-3'. The data are plotted as the function of  $\Delta R_n$  for each sample, which represents the reporter fluorescence for each allele (VIC/FAM) normalized to the passive reference dye.

**Imprinted Gene Analysis.** Mouse embryonic fibroblasts (MEFs) from strain C57BL6 (CAST 7), provided by M. Bartolomei

(University of Pennsylvania, Philadelphia), were cultured in DMEM supplemented with 10% (vol/vol) FCS and 10% (vol/vol) nonessential amino acids. Analysis of imprinted genes was performed using MEFs isolated from the C57BL/6 (CAST7) strain, which contains chromosome 7 from the *Mus castaneus* (Cast) strain in a C57BL/6 background, as previously described (1). Briefly, total RNA was extracted and cDNA synthesis was carried out as described above. For PCR amplification, the cDNA was added to Ready-To-Go PCR Beads (GE Life Sciences) together with 0.3  $\mu$ M gene-specific primers (Table S2). Expression of the imprinted gene was analyzed by allele-specific restriction enzyme digestion (StcI for *Ascl2*, StuI for *Kcnq1ot1*, MnlI for *Peg3*, and FauI for *Zim1*), and digested PCR products were resolved by polyacrylamide gel electrophoresis.

- Rivera RM, et al. (2008) Manipulations of mouse embryos prior to implantation result in aberrant expression of imprinted genes on day 9.5 of development. *Hum Mol Genet* 17(1):1–14.

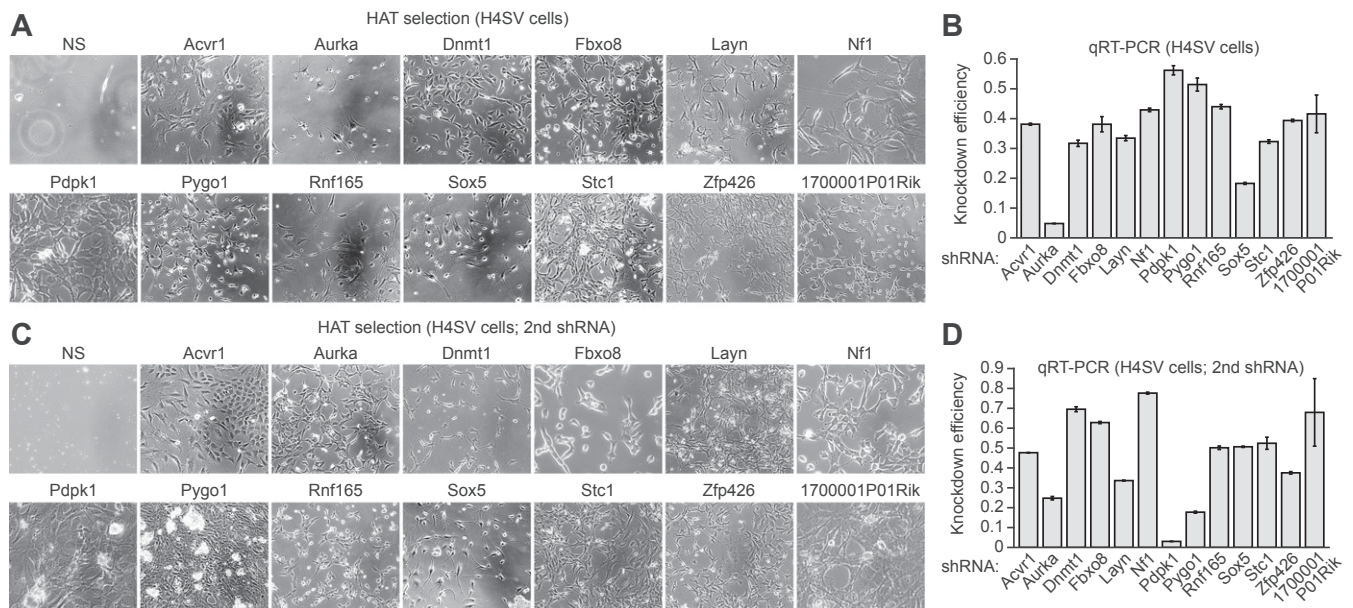

**Fig. S1.** shRNAs targeting an X-chromosome inactivation factor (XCIF) reactivate the inactive X chromosome (Xi)-linked *Hprt* gene and decrease mRNA levels of the targeted gene. (A) Bright-field images showing growth of the 13 XCIF KD H4SV cell lines following selection in hypoxanthine–aminopterin–thymidine (HAT) medium. (B) Quantitative real-time RT-PCR (qRT-PCR) analysis monitoring target gene expression in the 13 XCIF KD H4SV cell lines expressing the shRNA identified in the primary screen. For each gene, knockdown efficiency was determined relative to the level of target gene expression in the control cell line expressing a nonsilencing (NS) shRNA, which was set to 1. Error bars indicate SD. (C) Bright-field images showing growth of the 13 XCIF KD H4SV cell lines, expressing a second, unrelated shRNA to that shown in A, following selection in HAT medium. (D) qRT-PCR analysis monitoring target gene expression in the 13 XCIF KD H4SV cell lines expressing a second, unrelated shRNA to that shown in B. Error bars indicate SD.

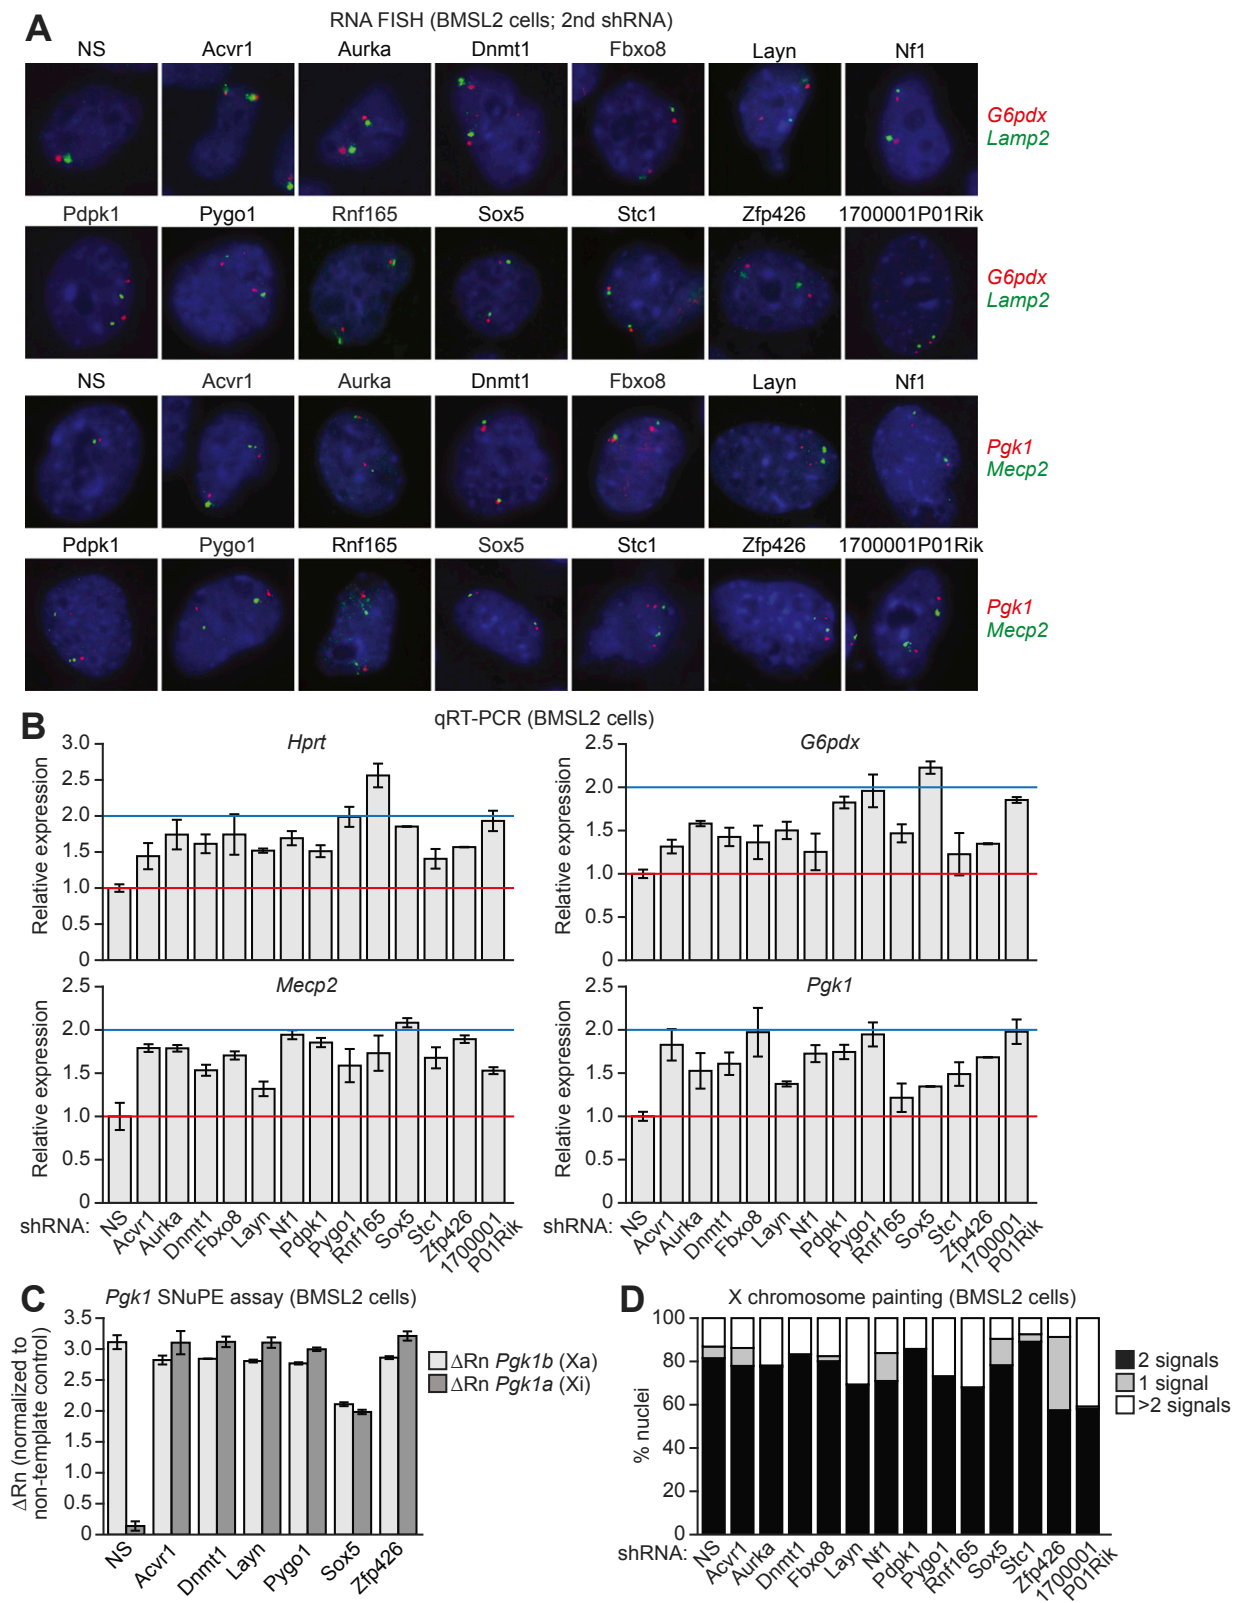

**Fig. S2.** Additional RNA FISH images and control experiments related to Fig. 1. (A) Representative two-color RNA FISH images showing expression of *G6pdx* (red) and *Lamp2* (green; Upper) and *Pgk1* (red) and *Mecp2* (green; Lower) in each of the 13 XCIF KD BMSL2 cell lines. DAPI staining is shown in blue. (B) qRT-PCR analysis monitoring expression of *Hprt*, *G6pdx*, *Mecp2*, and *Pgk1* in each of the 13 XCIF KD BMSL2 cell lines. The results were normalized to that obtained with the NS shRNA, which was set to 1 (red line). A twofold increase in expression is indicated by the blue line. (C) In BMSL2 cells, the Xi and Xa encode two distinguishable *Pgk1* alleles, *Pgk1a* and *Pgk1b*, respectively, which differ by a single-nucleotide polymorphism within the mRNA. Allele-specific expression of the Xi- and Xa-linked *Pgk1* genes in six representative XCIF KD BMSL2 cell lines was analyzed using a SNUPE assay. The data are plotted as the function of  $\Delta Rn$  Legend continued on following page

for each sample, which represents the reporter fluorescence for each allele (VIC/FAM) normalized to the passive dye. The results show that, in each of the six XCIF KD BMSL2 cell lines, the Xi-linked *Pgk1a* gene was reactivated. (D) X-chromosome painting experiments in the 13 XCIF KD BMSL2 cell lines. The results show that the X-chromosome content of the XCIF KD BMSL2 cell lines was similar to that of the control BMSL2 cell line expressing a NS shRNA. Thus, the substantially increased biallelic expression of X-linked genes observed by RNA FISH in the XCIF KD cell lines cannot be explained by differences in X-chromosome number.



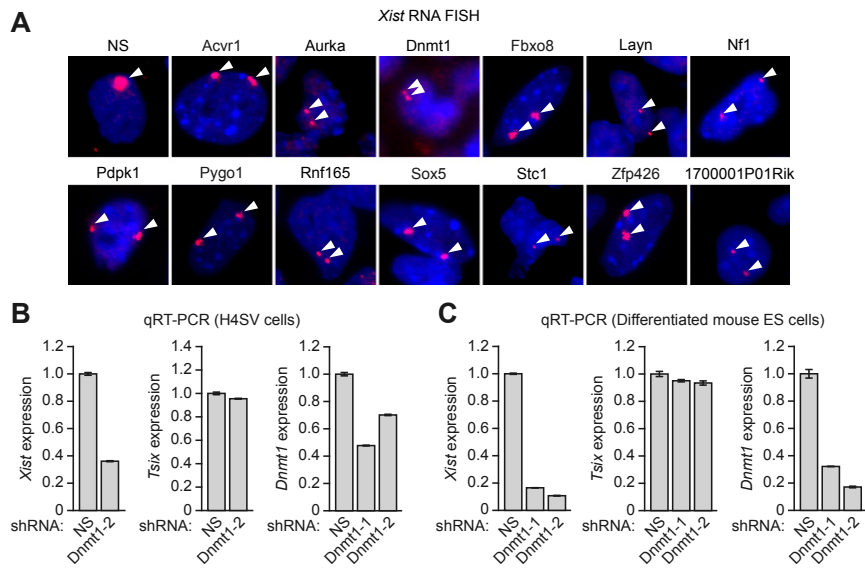

**Fig. S4.** RNA FISH images and control experiments related to Fig. 3. (A) RNA FISH images. In each of the 13 XCIF KD ES cell lines following differentiation, the majority of cells that lost the typical *Xist* localization pattern lacked a detectable *Xist* signal (Fig. 3B). However, some cells that had lost the typical *Xist* localization pattern contained two small *Xist* signals, reminiscent of undifferentiated ES cells. Examples of this latter localization pattern are shown here. Nuclear signals are indicated in red and denoted by arrowheads; DAPI staining is shown in blue. (B) qRT-PCR analysis monitoring expression of *Xist* (Left), *Tsix* (Center), and *Dnmt1* (Right) in H4SV cells expressing a NS or one of two Dnmt1 shRNAs (Dnmt1-1 or Dnmt1-2). For *Xist* and *Tsix* expression, a second, unrelated Dnmt1 shRNA to that used in Fig. 3H. Expression was normalized to that obtained with the control NS shRNA, which was set to 1. Error bars indicate SD. (C) qRT-PCR analysis monitoring expression of *Xist* (Left), *Tsix* (Center), and *Dnmt1* (Right) in differentiated ES cells expressing a NS shRNA or one of two Dnmt1 shRNAs (Dnmt1-1 or Dnmt1-2). Expression was normalized to that obtained with the control NS shRNA, which was set to 1. Error bars indicate SD.







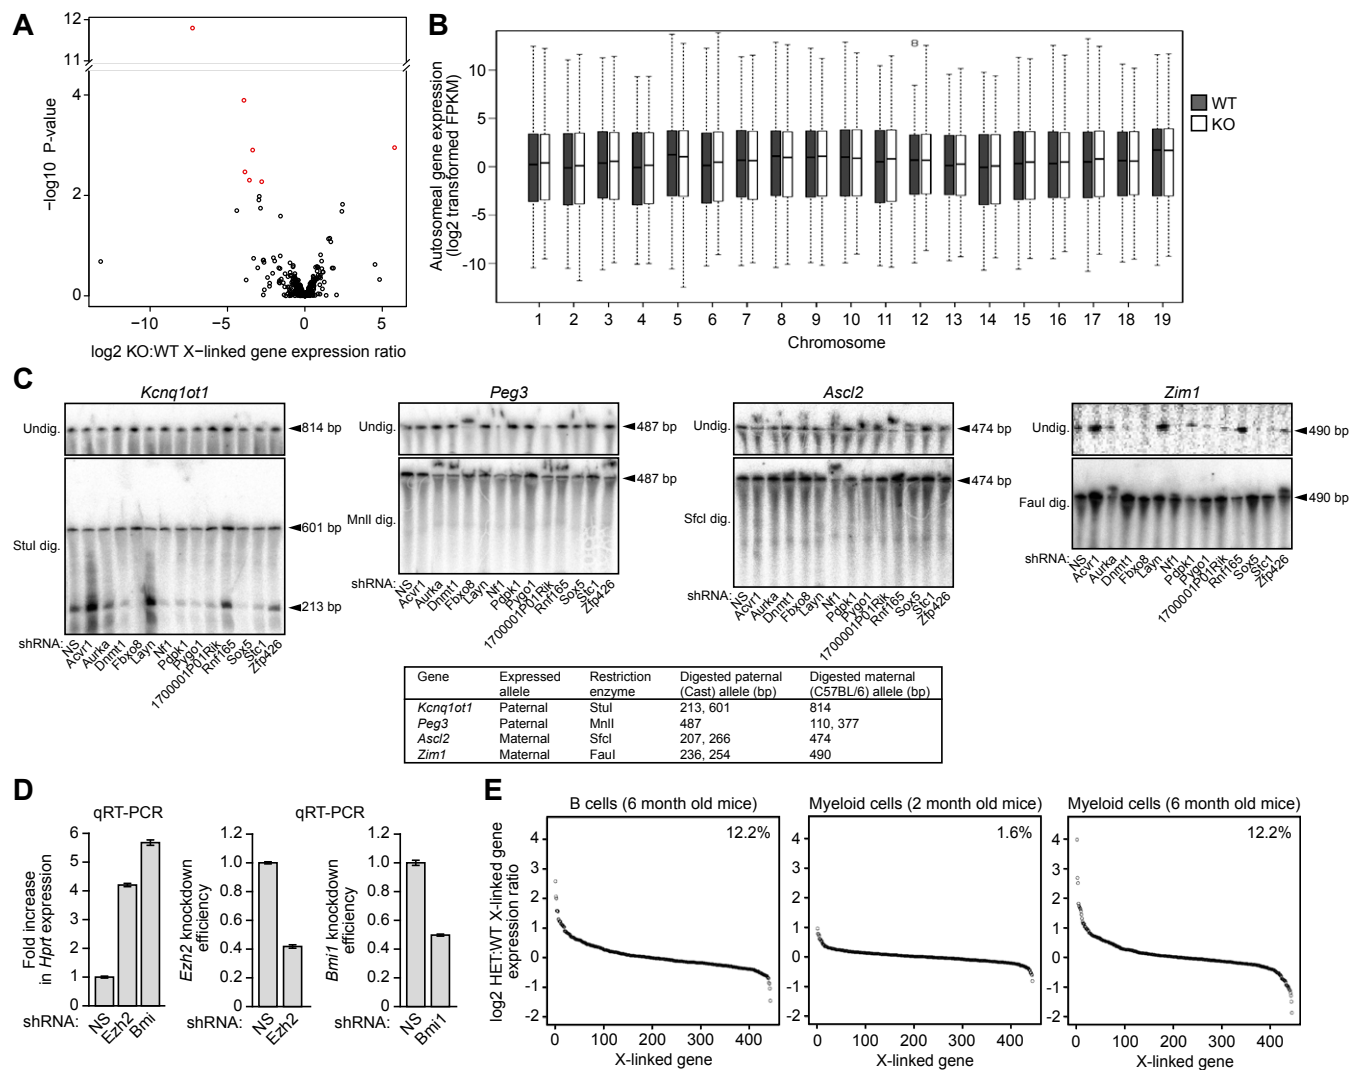

**Fig. S7.** Additional experiments and data analyses related to Fig. 6 and Discussion. (A) Volcano plot showing distribution of  $\log_2$ -transformed ratio of X-linked gene expression in MEFs isolated from *Stc1*<sup>-/-</sup> (KO) and *Stc1*<sup>+/+</sup> (WT) embryos ( $n = 3$  per genotype). The genes are plotted against negative transformed  $\log$  of  $P$  value. The red circles represent genes with a more than twofold change in expression and  $P < 0.01$ . The results show that the similarity of X-linked gene expression between female *Stc1*<sup>+/+</sup> and *Stc1*<sup>-/-</sup> MEFs was statistically significant. (B) Box plots displaying changes in autosomal gene expression [ $\log_2$ -transformed fragments per kilobase of exon per million fragments mapped (FPKM)] in *Stc1*<sup>-/-</sup> and *Stc1*<sup>+/+</sup> MEFs. The boxed areas span the first to the third quartile. The whiskers represent 15th and 85th percentiles; samples falling outside these percentiles are shown as circles. (C) XCIFs are not required for repression of imprinted genes. Primary female mouse embryonic fibroblasts from the strain C57BL/6 (CAST7), which contains chromosome 7 from *Mus castaneus* (Cast), were transduced with shRNAs against each of the XCIFs and analyzed for allele-specific expression of four genes located on chromosome 7 that are either paternally expressed (*Kcnq1ot1* and *Peg3*) or maternally expressed (*Ascl2* and *Zim1*). Expression of the two alleles can be distinguished by allele-specific restriction enzyme digestion following gene-specific RT-PCR. The sizes of the undigested and digested bands are indicated, and the sizes of the predicted digested fragments are shown in the table (Lower). If knockdown of an XCIF results in reactivation of the normally silenced allele, a mixture of the maternal and paternal allele-specific digestion patterns would be observed. The results show that, in all 13 XCIF KD cell lines, all four genes displayed only the expected allele-specific expression pattern, indicating that the XCIFs are not required for repression of the imprinted genes. (D) Requirement of Polycomb subunits EZH2 and BMI1 for repression of the X-linked *Hprt* gene. (Left) qRT-PCR analysis monitoring *Hprt* expression in BMSL2 cells expressing an *Ezh2* or *Bmi1* shRNA or, as a control, a NS shRNA. (Right) qRT-PCR analysis confirming target gene knockdown in mouse ES cells expressing an *Ezh2* (Left) or *Bmi1* (Right) shRNA. Error bars indicate SD. (E) Analysis of available datasets from Yildirim et al. (1) showing the distribution of  $\log_2$ -transformed ratio of X-linked gene expression in hematopoietic cells from female heterozygous (HET) *Xist* mutant mice and wild-type (WT) mice. The data were downloaded from Gene Expression Omnibus (GSE43961), normalized by RMA, and filtered by detection above background (DABG) (cutoff  $P$  value of  $<0.0001$ ) using Bioconductor package xps. The percentage of X-linked genes up-regulated  $>1.5$ -fold is shown.

1. Yildirim E, et al. (2013) *Xist* RNA is a potent suppressor of hematologic cancer in mice. *Cell* 152(4):727–742.





**Table S2. List of primers used for qRT-PCR and RT-PCR analysis, cDNA synthesis, CHIP assays, and mouse genotyping**

|                                  | Forward primer, 5'→3'              | Reverse primer(s), 5'→3'            |
|----------------------------------|------------------------------------|-------------------------------------|
| <b>qRT-PCR</b>                   |                                    |                                     |
| <i>Actin</i>                     | TTGCCGACAGGATGCAGAA                | GCCGATCCACACGGAGTACTT               |
| <i>Acrv1</i> (mouse)             | GGCCAGCAGTGTTCCTTC                 | TCCCTGCTCATAAACCTG                  |
| <i>ACVR1</i> (human)             | TCAGGAAGTGGCTCTGGTCT               | CGTTTCCCTGAACCATGACT                |
| <i>Aurka</i> (mouse)             | TAGGATACTGCTTGTACTT                | CCTCCAACCTGGAGCTGTA                 |
| <i>AURKA</i> (human)             | TGGAATATGCACCACTTGGGA              | ACTGACCACCCAAAATCTGC                |
| <i>Bmi1</i>                      | AAATCAGGGGGTTGAAAAATCT             | GCTAACCCCAATCTTCCCTTTG              |
| <i>Cdx2</i>                      | GCCAAGTGAAAACCAAGCAAAAAGAC         | GCTGCTGTTGCTGCTGCTGCTTC             |
| <i>Dnmt1</i> (mouse)             | GGAAGGCTACCTGGCTAAAGTCAAG          | ACTGAAAGGGTGCCTGCTCCGAC             |
| <i>DNMT1</i> (human)             | GTGGGGACTGTGCTCTCTGT               | TGAAAGCTGCATGCTCTCAC                |
| <i>Eomes</i>                     | CCTGGTGGTGTTCCTTGTG                | TTAATAGCACCCGGCACTC                 |
| <i>Ezh2</i>                      | CTAATTGGTACTTACTACGATAACTTT        | ACTCTAAACTCATAACCTGTCTACAT          |
| <i>Fbxo8</i> (mouse)             | GCTGAGCCATTTTCTTCTCG               | ATGATGGTTTCTGGCCACTC                |
| <i>FBXO8</i> (human)             | CAAGGGTTGTGGAGAGTGGT               | ATGTCAATGCCTCCTTGGAC                |
| <i>Gapdh</i>                     | ATGGCCTCCGTGTTCCCTAC               | ATAGGCCCTCTCTTGCCTAG                |
| <i>G6pdx</i>                     | TCAAAGCACACGCCCTCTT                | TAGCGCACAGCCAGTTTCC                 |
| <i>Hprt</i>                      | AAGCTTGCTGGTGAAAAGGA               | TTGCGCTCATCTTAGGCTTT                |
| <i>Layn</i> (mouse)              | GCAAGGAGAGTGGATGGGTA               | ACTTGTGATGCTGTGCTTGC                |
| <i>LAYN</i> (human)              | CTACAGGCCCTGCTGCTG                 | CTGACTAGCTGGCCTCCATC                |
| <i>Mecp2</i>                     | CATGGTAGCTGGGATGTTAGG              | GCAATCAATTCTACTTTAGAGCG             |
| <i>Nf1</i> (mouse)               | GTAGCCACAGTCCCTTGGC                | CTGAGAACAAGTACACAGAGAGTGA           |
| <i>NF1</i> (human)               | AATTCTGCCTCTGGGGTTT                | GCTGTTTCTTCAGGAGTCTG                |
| <i>Oct4</i>                      | CTCACCCCTGGCGTTCTCT                | AGGCCTCGAAGCGACAGA                  |
| <i>Pdpk1</i> (mouse)             | GGTCCAGTGGATAAGCGAAA               | TTTCTGCACCCTTGTGAGC                 |
| <i>PDPK1</i> (human)             | GACTCTTCCGTGCGTTCTTC               | GAGGAGAAAGGTGACCCACA                |
| <i>Pgk1</i>                      | ATGTCGCTTCCACAAGCTG                | GCTCCATTGTCCAAGCAGAAT               |
| <i>Pygo1</i> (mouse)             | TAAATGTCAGCGGAACAGGAC              | TTATCTGGCTTCCGAGTTG                 |
| <i>PYGO1</i> (human)             | ATCCTGGCTTTGGAGGCTAT               | GTGGCCCAAAGTTAAAAGCA                |
| <i>Rnf165</i> (mouse)            | ATGCCTCCAGCTACAGCCTA               | GCCCAATGCTAACTGAGAGC                |
| <i>RNF165</i> (human)            | AGGGAGAGCTGGAAAAGGAG               | AGCCCTCCCTGGTTTAGTGT                |
| <i>Sox5</i> (mouse)              | GTGGAAGAGGAGGAGTGA                 | AAATTCCTCAGAGTGAGGCTTG              |
| <i>SOX5</i> (human)              | AGGGACTCCCAGAGCTTAG                | TTGTTCTTGTGCTGCTTGG                 |
| <i>Stc1</i> (mouse)              | AAGTCATACAGCAGCCCAATCA             | CCAGAAGGCTTCGGACAAGTC               |
| <i>STC1</i> (human)              | TGATCAGTGTCTCTGCAACC               | TCACAGGTGGAGTTTCCAG                 |
| <i>Tcf7l2</i>                    | AAAAAGCTCCTCCGATTCC                | TAAAGAGCCCTCCATCTGTC                |
| <i>Tsix</i>                      | CAATCTCGCAAGATCCGGTGA (TSIX2F)     | TCAAGATGCGTGATATCTCGG (P422R)       |
| <i>Xist</i> (nonstrand specific) | CCCTGCTAGTTTCCCAATGA               | GGAAATGAGAAAGGGCACAA                |
| <i>Xist</i> (strand specific)    | GATGCCAACGACACGTCTGA (XIST2281F)   | AAGGACTCCAAAGTAACAATTCA (XIST2424R) |
| <i>XIST</i> (human)              | ACGCTGCATGTGCTTGTAGTCT             | ATTTGGAGCCTTATAGCTGTTTG             |
| <i>Zfp426</i> (mouse)            | ATGACCTTTCGCTCATGGAC               | GGCAAGCTTGTGCTTGTAGTGC              |
| <i>ZNF426</i> (human)            | CTGAGGTGGGTGGATCACTT               | CTCTGCTTCTGGGTTCAAG                 |
| <i>170001P01Rik</i> (mouse)      | GCTGATGTCAACTGTTTCC                | CGCAGAATCTCCACCCT                   |
| <i>C10orf98</i> (human)          | TCGGGCAAGGACAAAAGATAC              | CGATGGCTATGAAAGGAAAA                |
| <b>RT-PCR</b>                    |                                    |                                     |
| <i>Mecp2</i> (first round)       | CCGATCTGTGCAGGAGACCG               | TGGGGTCCCTCGGAGCTCTCGGGCT           |
| <i>Mecp2</i> (second round)      | GACCCGGGAGACGGTCAGCA               | AGCTCTCGGGCTCAGGTGGAGGT             |
| <i>Ascl2</i>                     | TGAGCATCCCACCCCTTA                 | CCAAACATCAGCGTCAGTATAG              |
| <i>Kncq1ot1</i>                  | ATTGGGAACTTGGGTGGAGGC              | GGCACACGGTATGAGAAAAGATTG            |
| <i>Peg3</i>                      | ATGCCACTCCGTACGGC                  | GCTCATCCTTGTGAACTTTG                |
| <i>Zim1</i>                      | CTTCAAGCAGAGCACAAGC                | GTGGCACAGAAAGGTTTCTC                |
| <b>cDNA synthesis</b>            |                                    |                                     |
| <i>Xist</i>                      | AGAGCATTACAATTCAAGGCTC (XIST2688R) |                                     |
| <i>Tsix</i>                      | GATGCCAACGACACGTCTGA (TSIX2R)      |                                     |
| <i>Gapdh</i>                     | TGTGAGGGAGATGCTCAGTG (GAPDR)       |                                     |
| <b>CHIP</b>                      |                                    |                                     |
| <i>Xist</i> (promoter)           | TAAAGGTCCAATAAGATGTCAGAA           | GGAGAGAAACCACGGAAGAA                |
| <i>Xist</i> (exon 2)             | GTGCTCTGCCTCAAGAAGAA               | GCACCTTCTACTCTCTAAATCCAG            |
| <b>Mouse genotyping</b>          |                                    |                                     |
| <i>Dnmt1</i> <sup>+/+</sup>      | CTTGGGCTGGATCTGGGGATC              | GGG CAGTTGTGTGACTTGG                |
| <i>Dnmt1</i> <sup>-/-</sup>      | GGGAACCTCCTGACTAGGGG               | GGGCCAGTTGTGTGACTTGG                |
| <i>Stc1</i> <sup>+/+</sup>       | AGCGCACGAGCGGAACAAA                | AGAGAGCCGCTGTGAGGCGT                |
| <i>Stc1</i> <sup>-/-</sup>       | AAAAGCCAGAGGTGCAAGAA               | TATGATCGGAATTCCTCGAC                |
| <i>SRY</i>                       | TTGCTAGAGAGCATGGAGGGCCATGTCAA      | CCACTCTCTGTGACACTTTAGCCCTCCGA       |

**Table S3. Oligo ID numbers for shRNAs obtained from Open Biosystems/Thermo Scientific**

| Gene                 | Oligo ID                                     |
|----------------------|----------------------------------------------|
| <i>Acvr1</i>         | V2MM_75565<br>V2MM_76215                     |
| <i>Aurka</i>         | V2MM_188005<br>V2MM_71909                    |
| <i>Bmi1</i>          | V2MM_10594<br>V2MM_2034                      |
| <i>Dnmt1</i>         | V2MM_46797<br>V2LMM_43170                    |
| <i>Ezh2</i>          | V2MM_35988<br>V2MM_30422                     |
| <i>Fbxo8</i>         | V2MM_36526<br>V3LMM_494067                   |
| <i>Layn</i>          | V2MM_130482<br>V2MM_214085                   |
| <i>Nf1</i>           | V2MM_194180<br>V2HS_76027                    |
| <i>Pdpk1</i>         | V2MM_75859<br>V2MM_72465                     |
| <i>Pygo1</i>         | V2MM_110610<br>V2MM_110609                   |
| <i>Rnf165</i>        | V2MM_172866<br>TRCN0000135474                |
| <i>Sox5</i>          | V2MM_6385<br>V2HS_94936                      |
| <i>Stc1</i>          | V2MM_22454<br>V2MM_26886                     |
| <i>Zfp426</i>        | TRCN0000109921<br>V2MM_31994                 |
| <i>1700001P01Rik</i> | TRCN0000085016<br>V2MM_100177<br>V2MM_205788 |

**Table S4. cDNAs used to prepare RNA FISH probes**

| Gene         | Clone no.*                            | Ref. |
|--------------|---------------------------------------|------|
| <i>G6pdx</i> | BAC clone RP23-13D21                  | 1    |
| <i>Lamp2</i> | BAC clone RP24-173A8                  | 1    |
| <i>Mecp2</i> | Fosmid clone WI1-894A5 or WI1-1269o10 |      |
| <i>Pgk1</i>  | BAC RP23-404E5                        |      |
| <i>Xist</i>  | —                                     | 2    |

\*Obtained from the BACPAC Resources Center.

1. Patrat C, et al. (2009) Dynamic changes in paternal X-chromosome activity during imprinted X-chromosome inactivation in mice. *Proc Natl Acad Sci USA* 106(13):5198–5203.
2. Shin J, et al. (2010) Maternal Rnf12/RLIM is required for imprinted X-chromosome inactivation in mice. *Nature* 467(7318):977–981.

## Other Supporting Information Files

[Dataset S1 \(XLS\)](#)
